# Supplementary material
Source: Springer Nature journal article supplement (https://www.springermedizin.de/resource/supplementary/12974_2005_47_MOESM1_ESM.pdf/9600660)
Supplement: MOESM1 [file 9600660]

A.

2 months

3 months

6 months

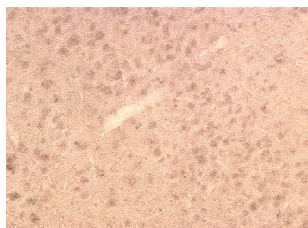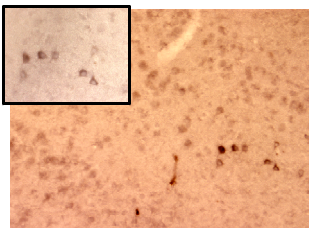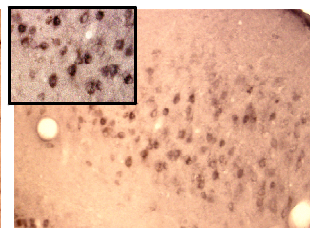

Entorhinal Cortex

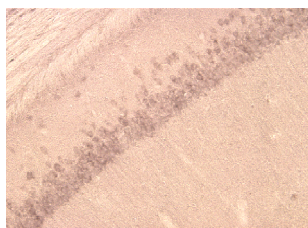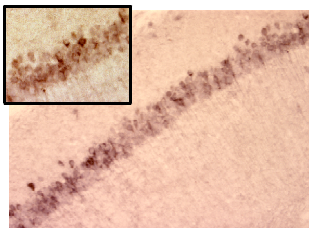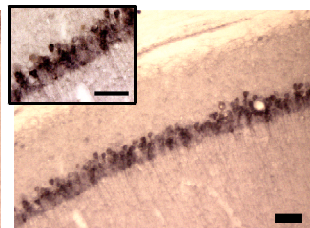

Hippocampus

3xTg-AD

B.

2 months

3 months

6 months

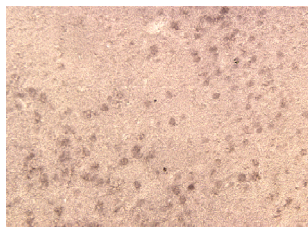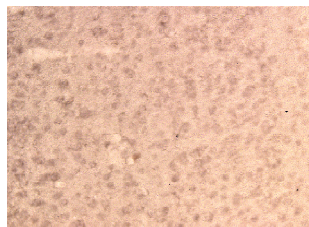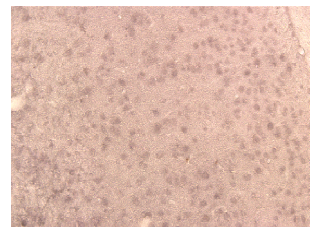

Entorhinal Cortex

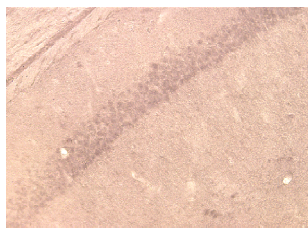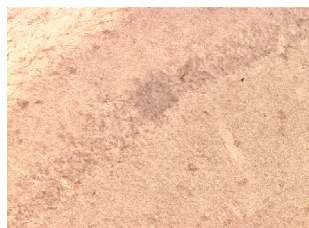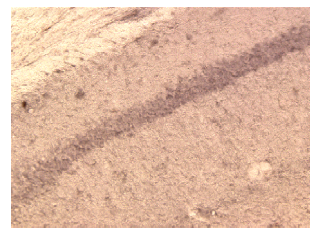

Hippocampus

Non-Tg
